# Supplementary material for: Long-Term Prognosis of Different Subtypes of Left Ventricular Noncompaction Cardiomyopathy Patients: A Retrospective Study in China
Source: MDPI journal article supplement (doi:10.3390/jcdd10090369), 2023-08-28
Supplement: s1 [file s1]

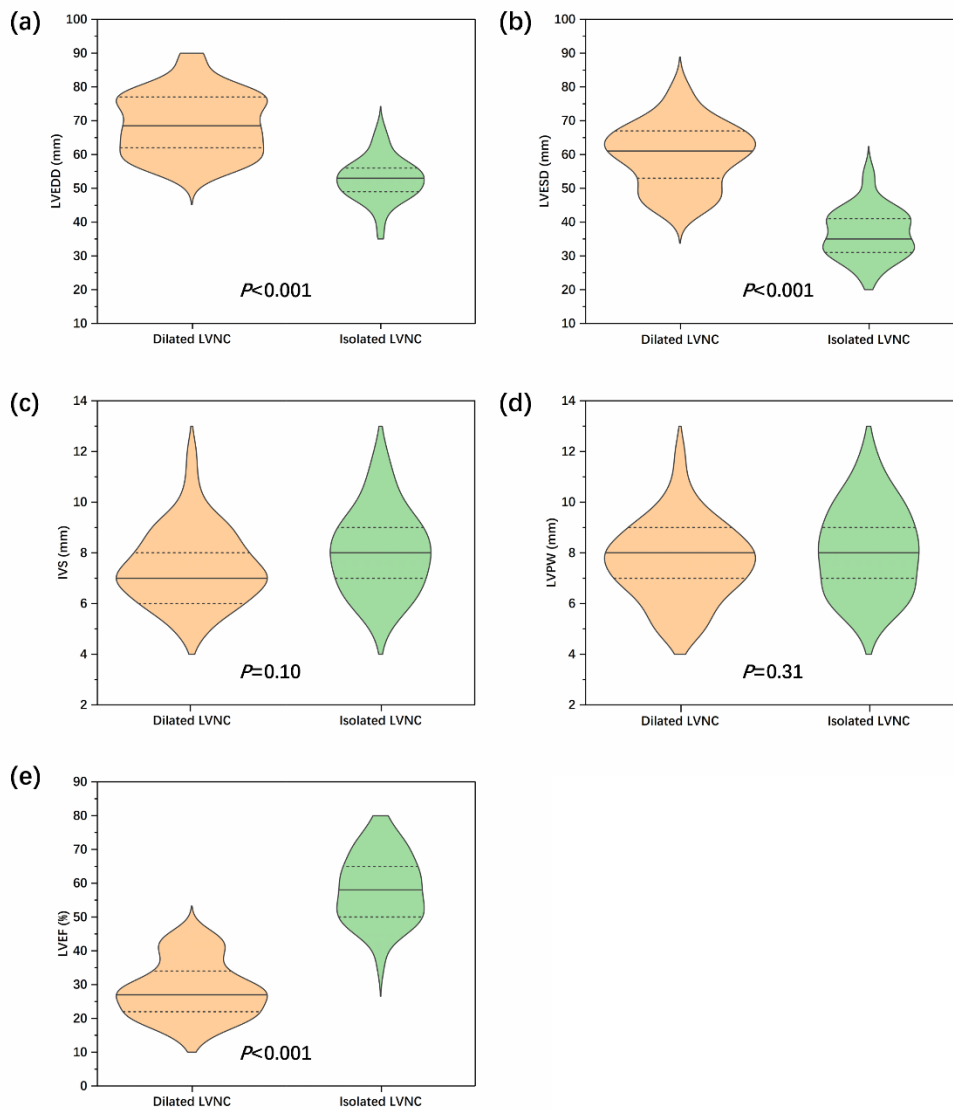

**Figure S1.** Distribution of echocardiography structural and functional parameters in dilated LVNC and isolated LVNC patients. Abbreviations: LVNC, left ventricular noncompaction; LVEDD, left ventricular end-diastolic diameter; LVESD, left ventricular end-systolic diameter; LVEF, left ventricular ejection fraction; IVS, interventricular septum; LVPW, left ventricular posterior wall. Solid lines and dotted lines represent the median and the quartiles, respectively. P values were calculated by the Mann–Whitney nonparametric test.

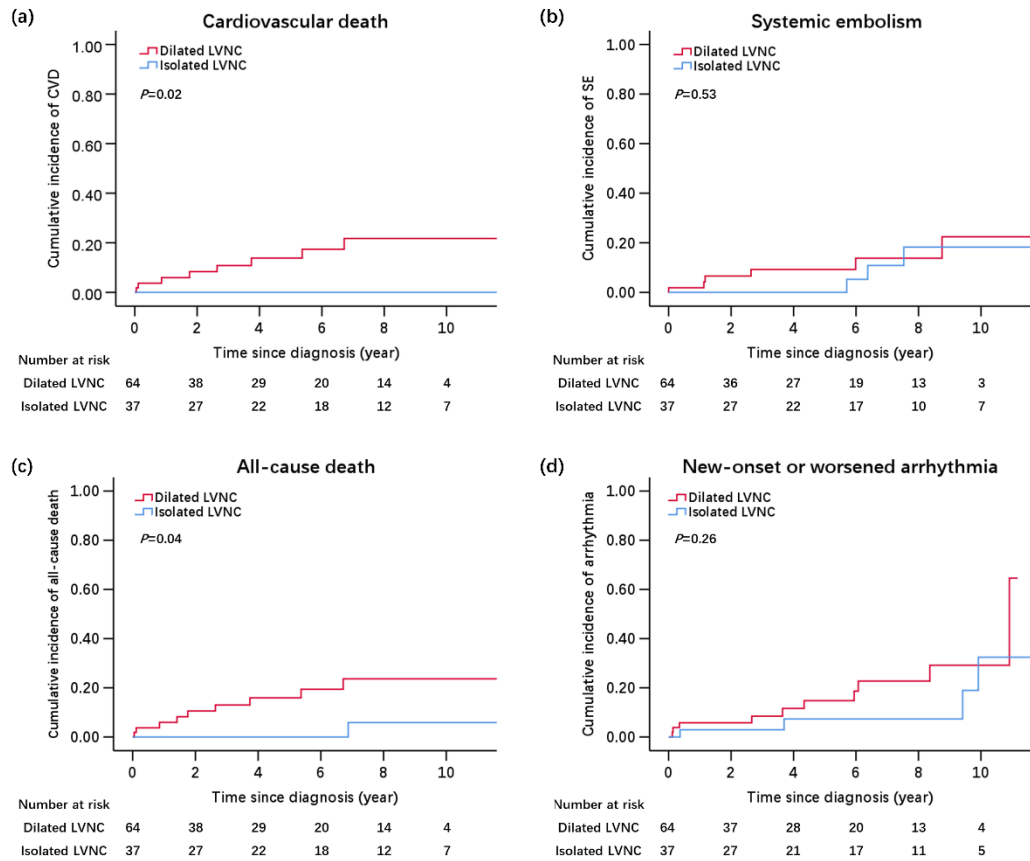

**Figure S2.** Kaplan-Meier curves for the cumulative incidence of cardiovascular death (a), systemic embolism (b), all-cause death (c) and new onset or worsened arrhythmia (d) stratified by isolated LVNC and dilated LVNC.

Abbreviations: LVNC, left ventricular noncompaction; HF, heart failure; HR hazards ratio; CI, confidence interval.

$P$  value was calculated by the log-rank test.

**Table S1. Comparison of baseline characteristics between followed-up and dropped-out patients**

| Baseline Characteristics                         | Followed-up<br>patients<br>(n=88) | Dropped-out<br>patients<br>(n=13) | P Value* |
|--------------------------------------------------|-----------------------------------|-----------------------------------|----------|
| Age of diagnosis, years                          | 46.5±16.3                         | 49.0±18.6                         | 0.62     |
| Age ≥60 y, No. (%)                               | 21 (23.9)                         | 5 (38.5)                          | 0.31     |
| Male, No. (%)                                    | 50 (56.8)                         | 7 (53.8)                          | 0.84     |
| Body mass index, kg/m <sup>2</sup>               | 23.1±3.4                          | 24.3±4.7                          | 0.33     |
| NYHA cardiac function class, No. (%)             |                                   |                                   |          |
| I or II                                          | 60 (68.2)                         | 6 (46.2)                          | 0.13     |
| III or IV                                        | 28 (31.8)                         | 7 (53.8)                          |          |
| Hypertension, No. (%)                            | 24 (27.3)                         | 5 (8.5)                           | 0.51     |
| Diabetes mellitus, No. (%)                       | 10 (11.4)                         | 2 (15.4)                          | 0.65     |
| Dyslipidemia, No. (%)                            | 28 (31.8)                         | 3 (23.1)                          | 0.75     |
| Coronary heart disease, No. (%)                  | 8 (9.1)                           | 1 (7.7)                           | >0.99    |
| Cigarette consumption, No. (%)                   | 34 (38.6)                         | 6 (46.2)                          | 0.61     |
| Alcohol intake, No. (%)                          | 34 (38.6)                         | 7 (53.8)                          | 0.30     |
| Abnormal ECG                                     | 52 (59.1)                         | 8 (61.5)                          | >0.99    |
| Echocardiography features                        |                                   |                                   |          |
| LVEDD, mm                                        | 62.0 (54.3–72.5)                  | 58.0 (56.5–72.5)                  | 0.82     |
| LVESD, mm                                        | 51.0 (39.0–63.0)                  | 51.0 (44.0–61.0)                  | 0.95     |
| LVEF, %                                          | 36.3 (27.0–54.0)                  | 34.0 (21.0–48.5)                  | 0.50     |
| IVS, mm                                          | 8.0 (6.9–9.0)                     | 8.0 (7.0–9.0)                     | 0.53     |
| LVPW, mm                                         | 8.0 (7.0–9.0)                     | 7.5 (7.0–9.0)                     | 0.94     |
| LA enlargement, No. (%)                          | 64 (72.7)                         | 11 (27.5)                         | 0.51     |
| MV regurgitation, No (%)                         |                                   |                                   |          |
| None to mild                                     | 65 (73.9)                         | 8 (61.5)                          | 0.34     |
| Moderate to severe                               | 23 (26.1)                         | 5 (38.5)                          |          |
| Laboratory examinations                          |                                   |                                   |          |
| Lipids profile, mmol/L                           |                                   |                                   |          |
| Total cholesterol                                | 4.07 (3.34–4.77)                  | 3.34 (3.19–4.48)                  | 0.10     |
| Triglycerides                                    | 1.17 (0.76–1.76)                  | 0.89 (0.62–1.12)                  | 0.05     |
| HDL-C                                            | 0.99 (0.80–1.19)                  | 1.04 (0.66–1.13)                  | 0.71     |
| LDL-C                                            | 2.58 (1.95–3.20)                  | 2.31 (1.84–2.58)                  | 0.23     |
| cTnI elevation, No. (%) <sup>†</sup>             | 20 (30.8)                         | 3 (27.3)                          | >0.99    |
| BNP or NT-proBNP elevation, No. (%) <sup>§</sup> | 64 (72.7)                         | 10 (76.9)                         | >0.99    |

Abbreviations: LVNC, left ventricular noncompaction; NYHA, New York Heart Association; ECG, electrocardiography; LVEDD, left ventricular end-diastolic diameter; LVESD, left ventricular end-systolic diameter; LVEF, left ventricular ejection fraction; IVS, interventricular septum; LVPW, left

ventricular posterior wall; LA, left atria; MV, mitral valve; HDL-C, high-density lipoprotein cholesterol; LDL-C, low-density lipoprotein cholesterol; cTnI, cardiac troponin I; BNP, brain natriuretic peptide; NT-proBNP, N-terminal pro-brain natriuretic peptide.

Values were given as mean  $\pm$  SD, number (%), or median (interquartile range).

*P* values were calculated by Student *t* test or Mann-Whitney nonparametric test for quantitative variables, and by Chi-square test or Fisher's precise test for qualitative variables, when appropriate.

<sup>†</sup>Elevation in cTnI was defined as baseline cTnI above 99th percentile upper reference limit.

<sup>§</sup>Elevation in BNP or NT-proBNP was defined as BNP >35 ng/L or NT-proBNP >125 ng/L in patients with sinus rhythm, or BNP >105 ng/L or NT-proBNP >365 ng/L in patients with atrial fibrillation.

**Table S2. Multivariate analysis of risk factors associated with dilated LVNC**

| Risk factor                        | Dilated LVNC (n=64) | Isolated LVNC (n=37) | <i>P</i> Value <sup>†</sup> | Multivariate analysis <sup>*</sup> |                |
|------------------------------------|---------------------|----------------------|-----------------------------|------------------------------------|----------------|
|                                    |                     |                      |                             | OR (95% CI)                        | <i>P</i> value |
| Male, No. (%)                      | 41 (64.1)           | 16 (43.2)            | 0.04                        | 2.21 (0.81, 6.08)                  | 0.12           |
| Age≥60 y, No. (%)                  | 22 (34.4)           | 4 (10.8)             | <0.01                       | 4.19 (1.26, 13.93)                 | 0.02           |
| Body mass index, kg/m <sup>2</sup> | 22.8±3.5            | 23.9±3.5             | 0.19                        | -                                  | -              |
| Hypertension, No. (%)              | 16 (25.0)           | 13 (35.1)            | 0.28                        | -                                  | -              |
| Diabetes mellitus, No. (%)         | 8 (12.5)            | 4 (10.8)             | >0.99                       | -                                  | -              |
| Coronary heart disease, No. (%)    | 8 (12.5)            | 1 (2.7)              | 0.15                        | -                                  | -              |
| Dyslipidemia, No. (%)              | 25 (39.1)           | 6 (16.2)             | 0.02                        | 2.64 (0.92, 7.59)                  | 0.07           |
| Cigarette consumption, No. (%)     | 29 (45.3)           | 11 (29.7)            | 0.12                        | -                                  | -              |
| Alcohol intake, No. (%)            | 29 (45.3)           | 12 (32.4)            | 0.20                        | 1.14 (0.40, 3.23)                  | 0.80           |

Abbreviations: LVNC, left ventricular noncompaction; OR, odds ratio; CI, confidence interval; NYHA, New York Heart Association.

Values were given as mean ± SD or number (%).

<sup>†</sup>*P* values were calculated by the Student t-test or Mann-Whitney nonparametric test for quantitative variables, and Chi-square test or Fisher's precise test for qualitative variables, when appropriate.

<sup>\*</sup>OR (95% CI) and *P* values were calculated by using the Logistic regression model.

**Table S3. Univariate and multivariate analysis of variables associated with MACE among patients with LVNC\***

|                                      | Univariate analysis  |                   | Multivariate analysis   |                   |
|--------------------------------------|----------------------|-------------------|-------------------------|-------------------|
|                                      | Crude HR<br>(95% CI) | <i>P</i><br>value | Adjusted HR<br>(95% CI) | <i>P</i><br>value |
| Dilated LVNC                         | 7.62 (2.70, 21.53)   | <0.001            | 4.43 (1.24, 15.81)      | 0.02              |
| Male                                 | 2.48 (1.22, 5.01)    | 0.01              | 1.47 (0.60, 3.61)       | 0.41              |
| Age ≥60 y                            | 2.25 (1.17, 4.37)    | 0.02              | 1.39 (0.69, 2.77)       | 0.36              |
| NYHA functional class III-IV         | 1.54 (0.80, 2.96)    | 0.20              | 0.73 (0.36, 1.47)       | 0.38              |
| Hypertension                         | 0.67 (0.32, 1.43)    | 0.30              | -                       | -                 |
| Diabetes mellitus                    | 1.26 (0.52, 3.07)    | 0.61              | -                       | -                 |
| Dyslipidemia                         | 1.60 (0.83, 3.09)    | 0.16              | -                       | -                 |
| Coronary heart disease               | 1.57 (0.61, 4.04)    | 0.35              | -                       | -                 |
| Cigarette consumption                | 2.05 (1.08, 3.92)    | 0.03              | 1.56 (0.69, 3.50)       | 0.28              |
| Alcohol intake                       | 1.69 (0.89, 3.24)    | 0.11              | -                       | -                 |
| Abnormal ECG                         | 2.91 (1.36, 6.20)    | <0.01             | 1.13 (0.47, 2.13)       | 0.79              |
| LBBB                                 | 2.07 (1.02, 4.20)    | 0.04              | -                       | -                 |
| Atrial fibrillation                  | 1.40 (0.55, 3.60)    | 0.49              | -                       | -                 |
| Ventricular tachycardia              | 2.09 (0.87, 5.05)    | 0.10              | -                       | -                 |
| LA enlargement                       | 16.94 (2.32, 123.67) | <0.01             | -                       | -                 |
| Moderate-severe mitral regurgitation | 2.02 (1.04, 3.94)    | 0.04              | -                       | -                 |
| cTnI elevation <sup>†</sup>          | 2.76 (1.33, 5.71)    | <0.01             | -                       | -                 |
| BNP/NT-proBNP elevation <sup>§</sup> | 8.77 (2.10, 36.56)   | <0.01             | 2.46 (0.45, 13.43)      | 0.30              |

Abbreviations: LVNC, left ventricular noncompaction; NYHA, New York Heart Association; HR, hazards ratio; CI, confidence interval; ECG, electrocardiography; LBBB, left bundle branch block; LA, left atria; cTnI, cardiac troponin I; BNP, brain natriuretic peptide; NT-proBNP, N-terminal pro-brain natriuretic peptide.

HR (95% CI) and *P* values were calculated by using the Cox proportional-hazards regression model.

<sup>†</sup>Elevation in cTnI was defined as baseline cTnI above 99th percentile upper reference limit.

<sup>§</sup>Elevation in BNP or NT-proBNP was defined as BNP >35 ng/L or NT-proBNP >125 ng/L in patients with sinus rhythm, or BNP >105 ng/L or NT-proBNP >365 ng/L in patients with atrial fibrillation.

**Table S4. Univariate and multivariate analysis of variables associated with heart failure among patients with LVNC**

|                                      | Univariate analysis  |                   | Multivariate analysis   |                   |
|--------------------------------------|----------------------|-------------------|-------------------------|-------------------|
|                                      | Crude HR<br>(95% CI) | <i>P</i><br>value | Adjusted HR<br>(95% CI) | <i>P</i><br>value |
| Dilated LVNC                         | 11.43 (2.71, 48.26)  | < 0.01            | 7.52 (1.47, 38.52)      | 0.02              |
| Male                                 | 2.44 (1.07, 5.56)    | 0.03              | 1.44 (0.50, 4.18)       | 0.50              |
| Age ≥ 60y                            | 1.82 (0.84, 3.97)    | 0.13              | 1.05 (0.46, 2.41)       | 0.91              |
| NYHA functional class III-IV         | 1.14 (0.51, 2.54)    | 0.75              | 0.50 (0.22, 1.16)       | 0.11              |
| Abnormal ECG                         | 3.15 (1.27, 7.82)    | 0.01              | 1.10 (0.38, 3.13)       | 0.86              |
| LBBB                                 | 1.05 (0.40, 2.78)    | 0.92              | -                       | -                 |
| Atrial fibrillation                  | 2.13 (0.81, 5.63)    | 0.13              | -                       | -                 |
| Ventricular tachycardia              | 2.51 (0.94, 6.68)    | 0.07              | -                       | -                 |
| LA enlargement                       | 2.29 (1.06, 4.94)    | 0.04              | -                       | -                 |
| Moderate-severe mitral regurgitation | 2.02 (1.04, 3.94)    | 0.04              | -                       | -                 |
| cTnI elevation <sup>†</sup>          | 2.01 (0.85, 4.73)    | 0.11              | -                       | -                 |
| BNP/NT-proBNP elevation <sup>§</sup> | 12.67 (1.71, 93.24)  | 0.01              | 3.52 (0.38, 32.39)      | 0.27              |
| Hypertension                         | 0.47 (0.18, 1.25)    | 0.13              | -                       | -                 |
| Diabetes mellitus                    | 1.49 (0.55, 4.02)    | 0.43              | -                       | -                 |
| Dyslipidemia                         | 1.11 (0.50, 2.46)    | 0.81              | -                       | -                 |
| Coronary heart disease               | 1.22 (0.37, 4.07)    | 0.74              | -                       | -                 |
| Cigarette consumption                | 1.75 (0.82, 3.74)    | 0.15              | 1.36 (0.52, 3.58)       | 0.53              |
| Alcohol intake                       | 1.29 (0.60, 2.79)    | 0.51              | -                       | -                 |

Abbreviations: LVNC, left ventricular noncompaction; NYHA, New York Heart Association; ECG, electrocardiography; LBBB, left bundle branch block; LA, left atria; cTnI, cardiac troponin I; BNP, brain natriuretic peptide; NT-proBNP, N-terminal pro-brain natriuretic peptide.

HR (95% CI) and *P* value were calculated by using the Cox proportional-hazards regression model.

<sup>†</sup>Elevation in cTnI was defined as baseline cTnI above 99th percentile upper reference limit.

<sup>§</sup>Elevation in BNP or NT-proBNP was defined as BNP >35 ng/L or NT-proBNP >125 ng/L in patients with sinus rhythm, or BNP >105 ng/L or NT-proBNP >365 ng/L in patients with atrial fibrillation.
